# Supplementary material for: What Is a Dingo? The Phenotypic Classification of Dingoes by Aboriginal and Torres Strait Islander Residents in Northern Australia
Source: MDPI journal article supplement (doi:10.3390/ani10071230), 2020-07-20
Supplement: s1 [file s1]

# What is a Dingo? The Phenotypic Classification of Dingoes by Aboriginal and Torres Strait Islander Residents in Northern Australia

Victoria J. Brookes, Chris Degeling, Lily M. van Eeden, Michael P. Ward

Supplementary Material: Questionnaire; questions in red were not used in the survey. Participants were asked questions and shown pictures, and surveyors completed the responses on the form.

## What is a dingo? Perspectives on dingo phenotype in northern Australia

### Questionnaire Part 1

Name:

Sex:

Do you identify as an Aboriginal and/or Torres Strait Islander?

Do you have dingo or dog as a totem? Which one?

Age: 18-24 years  
25-34 years  
35-44 years  
45-54 years  
55-64 years  
65-74 years  
≥ 75 years

Do you work with animals or the environment (and duration, years)?

In which community do you currently live?

How long (years) have you lived in the NPA?

ID (for anonymization):

Question prompts for researchers:

What type of dog is in the picture? (Circle the answer).

If the answer is domestic or dingo: Is it completely X? (Mark the line).

If the answer is hybrid: Is it closer to a domestic or a dingo? (Mark the line).

If hybrid: If the council were making a policy to protect dingoes, would you count this dog as a dingo for protection?

What is it about this dog that made you decide how it should be classified? (Tick and add information)

**Questionnaire Part 2**

**ID.....**

1. Dingo \_\_\_\_\_ H \_\_\_\_\_  
colour  shape  face  ears  feet

Domestic Dog  
tail  gait

2. Dingo \_\_\_\_\_ H \_\_\_\_\_  
colour  shape  face  ears  feet

Domestic Dog  
tail  gait

3. Dingo \_\_\_\_\_ H \_\_\_\_\_  
colour  shape  face  ears  feet

Domestic Dog  
tail  gait

4. Dingo \_\_\_\_\_ H \_\_\_\_\_  
colour  shape  face  ears  feet

Domestic Dog  
tail  gait

5. Dingo \_\_\_\_\_ H \_\_\_\_\_  
colour  shape  face  ears  feet

Domestic Dog  
tail  gait

6. Dingo \_\_\_\_\_ H \_\_\_\_\_  
colour  shape  face  ears  feet

Domestic Dog  
tail  gait

7. Dingo \_\_\_\_\_ H \_\_\_\_\_  
colour  shape  face  ears  feet

Domestic Dog  
tail  gait

8. Dingo \_\_\_\_\_ H \_\_\_\_\_  
colour  shape  face  ears  feet

Domestic Dog  
tail  gait

9. Dingo \_\_\_\_\_ H \_\_\_\_\_  
colour  shape  face  ears  feet

Domestic Dog  
tail  gait

10. Dingo \_\_\_\_\_ H \_\_\_\_\_  
colour  shape  face  ears  feet

Domestic Dog  
tail  gait

11. Dingo \_\_\_\_\_ H \_\_\_\_\_  
colour  shape  face  ears  feet

Domestic Dog  
tail  gait

12. Dingo \_\_\_\_\_ H \_\_\_\_\_  
colour  shape  face  ears  feet

Domestic Dog  
tail  gait
